# Supplementary material
Source: PubMed Central journal article supplement (PMC9009059)
Supplement: 12906_2022_3581_MOESM1_ESM.pdf [file 12906_2022_3581_MOESM1_ESM.pdf]

|               | Room 1                                                                                      | Room 2                                                                   | Room 3                                                                      | Room 4                                                            | Room 5                                               | Room 6                                               |
|---------------|---------------------------------------------------------------------------------------------|--------------------------------------------------------------------------|-----------------------------------------------------------------------------|-------------------------------------------------------------------|------------------------------------------------------|------------------------------------------------------|
| 07:30         | Opening of online registration                                                              |                                                                          |                                                                             |                                                                   |                                                      |                                                      |
| 08:00 – 09:15 | <b>Plenary 1</b><br>Integrative Pediatrics                                                  |                                                                          |                                                                             |                                                                   |                                                      |                                                      |
| 09:15 – 09:30 | Networking Break (coffee   view ePoster   visit exhibition   chat)                          |                                                                          |                                                                             |                                                                   |                                                      |                                                      |
| 09:30 – 10:30 | <b>Session 1</b><br>Infections, antibiotics and complementary medicine                      | <b>Session 2</b><br>Pediatric immunology                                 | <b>Session 3</b><br>Chronic pain (integrative & interdisciplinary approach) | <b>Workshop 1</b><br>Self-Awareness/ Self-Care for physicians     | <b>SwissPedNet</b><br>Research Session 1             | <b>Oral presentations 1</b>                          |
| 10:30 – 11:00 | Networking Break (coffee   view ePoster   visit exhibition   chat)                          |                                                                          |                                                                             |                                                                   |                                                      |                                                      |
| 11:00 – 12:00 | <b>Plenary 2</b><br>Psychosomatics & Eating disorders                                       |                                                                          |                                                                             |                                                                   |                                                      |                                                      |
| 12:00 – 13:00 | Networking Break (lunch   view ePoster   visit exhibition   chat)                           |                                                                          |                                                                             |                                                                   |                                                      |                                                      |
| 13:00 – 14:00 | <b>Session 4</b><br>Choosing wisely in pediatrics                                           | <b>Session 5</b><br>Psychosomatics: abdominal pain and enuresis (German) | <b>Session 6</b><br>Psychosomatics: abdominal pain and enuresis (French)    |                                                                   | <b>SwissPedNet</b><br>Research Session 2             | <b>Oral presentations 2</b>                          |
| 14:00 – 14:15 | Networking Break (coffee   view ePoster   visit exhibition   chat)                          |                                                                          |                                                                             |                                                                   |                                                      |                                                      |
| 14:15 – 15:45 | <b>Session 7</b><br>Integrative medicine in children's hospitals                            | <b>Session 8</b><br>Update on vaccination                                |                                                                             | <b>Session 9</b><br>Integrative pediatric oncology                | <b>Workshop 2</b><br>Mindfulness (French)            | <b>Workshop 3</b><br>Mindfulness (German)            |
| 15:45 – 16:15 | Networking Break (coffee   view ePoster   visit exhibition   chat)                          |                                                                          |                                                                             |                                                                   |                                                      |                                                      |
| 16:15 – 17:15 | <b>Session 10</b><br>COVID-19 News and Views                                                | <b>Session 11</b><br>Child abuse (German)                                | <b>Session 12</b><br>Child abuse (French)                                   |                                                                   | <b>Workshop 4</b><br>Motivational interview (German) | <b>Workshop 5</b><br>Motivational interview (French) |
| 17:15 – 17:30 | Networking Break (coffee   view ePoster   visit exhibition   chat)                          |                                                                          |                                                                             |                                                                   |                                                      |                                                      |
| 17:30 – 18:30 | <b>Plenary 3</b><br>Pediatric integrative medicine (global) & Integrative treatment of ADHD |                                                                          |                                                                             |                                                                   |                                                      |                                                      |
| 18.30 – 18.45 | Networking Break (apéro   view ePoster   visit exhibition   chat)                           |                                                                          |                                                                             |                                                                   |                                                      |                                                      |
| 18:45 – 19:45 | <b>Meet the Expert 1</b><br>Shared decision making                                          | <b>Meet the Expert 2</b><br>Homeopathy (German)                          | <b>Meet the Expert 3</b><br>Homeopathy (French)                             | <b>Meet the Expert 4</b><br>Integrative approach to ADHD & Autism |                                                      | SIGIP meets PIM Leaders (on invitation only)         |
| 19.45         | End of first congress day                                                                   |                                                                          |                                                                             |                                                                   |                                                      |                                                      |

|               | Room 1                                                                       | Room 2                                                                                     | Room 3                                                                 | Room 4                                                                     | Room 5                                   | Room 6                      |
|---------------|------------------------------------------------------------------------------|--------------------------------------------------------------------------------------------|------------------------------------------------------------------------|----------------------------------------------------------------------------|------------------------------------------|-----------------------------|
| 07:30         | Opening of online registration                                               |                                                                                            |                                                                        |                                                                            |                                          |                             |
| 08:00 – 09:00 | <b>Meet the Expert 5</b><br>Phytotherapy for acute infections (German)       | <b>Meet the Expert 6</b><br>Phytotherapy for acute infections (French)                     | <b>Meet the Expert 7</b><br>Integrative pediatric dermatology (German) |                                                                            |                                          |                             |
| 09:00 – 09:15 | Networking Break (coffee   view ePoster   visit exhibition   chat)           |                                                                                            |                                                                        |                                                                            |                                          |                             |
| 09:15 – 10:30 | <b>Plenary 4</b><br>Integrative approach to asthma & Adolescents and screens |                                                                                            |                                                                        |                                                                            |                                          |                             |
| 10:30 – 11:00 | Networking Break (coffee   view ePoster   visit exhibition   chat)           |                                                                                            |                                                                        |                                                                            |                                          |                             |
| 11:00 – 12:00 | <b>Session 13</b><br>Digital Media                                           | <b>Symposium Kinderärzte Schweiz</b><br>Complementary and integrative medicine in practice | <b>Meet the Expert 8</b><br>Integrative pediatric dermatology (French) | <b>Workshop 6</b><br>Self-Awareness/ Self-Care for physicians              | <b>SwissPedNet</b><br>Research Session 3 | <b>Oral presentations 3</b> |
| 12:00 – 14:00 | Networking Break (lunch   view ePoster   visit exhibition   chat)            |                                                                                            |                                                                        |                                                                            |                                          |                             |
| 12:10 – 14:00 | General assembly<br>Swiss Society of Pediatrics                              |                                                                                            |                                                                        |                                                                            |                                          |                             |
| 14:00 – 15:30 | <b>Research Session</b><br>Research in pediatric integrative medicine        | <b>Session 14</b><br>Nutrition                                                             | <b>Session 15</b><br>Adolescent health                                 | <b>Workshop 7</b><br>External applications (basics and practice)           | <b>Workshop 8</b><br>Acupuncture         |                             |
| 15:30 – 16:00 | Networking Break (coffee   view ePoster   visit exhibition   chat)           |                                                                                            |                                                                        |                                                                            |                                          |                             |
| 16:00 – 17:30 | <b>Plenary 5</b><br>Irritable bowel syndrome                                 |                                                                                            |                                                                        |                                                                            |                                          |                             |
| 17:30 – 17:45 | Networking Break (coffee   view ePoster   visit exhibition   chat)           |                                                                                            |                                                                        |                                                                            |                                          |                             |
| 17:45 – 18:45 | <b>Session 16</b><br>Fever                                                   | <b>Session 17</b><br>Anthroposophic medicine & Heart based medicine                        |                                                                        | <b>Session 18</b><br>Complementary therapies for functional abdominal pain |                                          |                             |
| 18:45         | End of congress                                                              |                                                                                            |                                                                        |                                                                            |                                          |                             |
